# Supplementary material for: Molecular-based approaches to characterize coastal microbial community and their potential relation to the trophic state of Red Sea
Source: PubMed Central journal article supplement (PMC4355682; doi:10.1038/srep09001), 2015-03-11
Supplement: srep09001-s1.pdf [file srep09001-s1.pdf]

**Molecular-based approaches to characterize coastal microbial community and their  
potential relation to the trophic state of Red Sea**

Mohd Ikram Ansari <sup>1</sup>, Moustapha Harb <sup>1</sup>, Burton Jones <sup>2</sup>, and Pei-Ying Hong <sup>1\*</sup>

<sup>1</sup> Water Desalination and Reuse Center, Environmental Science and Engineering

<sup>2</sup> Red Sea Research Center, King Abdullah University of Science and Technology  
(KAUST), 4700 King Abdullah Boulevard, Thuwal 23955-6900, Saudi Arabia

\* Corresponding author:

Pei-Ying Hong

Email: [peiying.hong@kaust.edu.sa](mailto:peiying.hong@kaust.edu.sa)

Phone: +966-12-8082218

**Table S1.** GPS coordinates of sampling sites.

| <b>Name</b> | <b>Description</b> | <b>Longitude</b> | <b>Latitude</b> |
|-------------|--------------------|------------------|-----------------|
| N1          | North sites        | 39.0922°         | 21.6085°        |
| N2          |                    | 39.0923°         | 21.5995°        |
| N3          |                    | 39.0924°         | 21.5906°        |
| N4          |                    | 39.0932°         | 21.5816°        |
| N5          |                    | 39.0951°         | 21.5727°        |
| N6          |                    | 39.0684°         | 21.5906°        |
| N7          |                    | 39.0442°         | 21.5906°        |
| N8          |                    | 39.0201°         | 21.5905°        |
| N9          |                    | 38.9959°         | 21.5905°        |
|             |                    |                  |                 |
| S1          | South sites        | 39.0833°         | 21.3413°        |
| S2          |                    | 39.0838°         | 21.3323°        |
| S3          |                    | 39.0863°         | 21.3235°        |
| S4          |                    | 39.0882°         | 21.3149°        |
| S5          |                    | 39.0883°         | 21.3060°        |
| S6          |                    | 39.0592°         | 21.3413°        |
| S7          |                    | 39.0207°         | 21.3413°        |
| S8          |                    | 38.9965°         | 21.3410°        |
|             |                    |                  |                 |
| NS1         | North-South sites  | 39.0919°         | 21.4970°        |
| NS2         |                    | 39.0870°         | 21.4209°        |
|             |                    |                  |                 |
| T1          | Transect           | 38.9436°         | 22.2798°        |
| T2          |                    | 38.9309°         | 22.1420°        |
| T3          |                    | 38.8486°         | 22.0287°        |
| T4          |                    | 38.9350°         | 21.9319°        |
| T5          |                    | 39.0014°         | 21.8141°        |
| T6          |                    | 39.0718°         | 21.6985°        |
| T7          |                    | 39.1489°         | 21.1000°        |
| T8          |                    | 39.0853°         | 21.6430°        |
|             |                    |                  |                 |
| KW1         | KAUST Beach        | 39.0887°         | 22.2925°        |
| KW2         |                    | 39.0898°         | 22.2924°        |
| KW3         |                    | 39.0903°         | 22.2918°        |
| KW4         |                    | 39.0903°         | 22.2909°        |
|             |                    |                  |                 |
| TW1         | Thuwal Beach       | 39.0877°         | 22.2765°        |
| TW2         |                    | 39.0876°         | 22.2751°        |
| TW3         |                    | 39.0872°         | 22.2743°        |
| TW4         |                    | 39.0868°         | 22.2732°        |

**Table S2.** Oligonucleotide primer sequences used for microbial source tracking and for quantification of pathogens.

| Primer names | Target                        | Sequence (5'-3')                   | Amplicon size (bp) | Amplification factor |
|--------------|-------------------------------|------------------------------------|--------------------|----------------------|
| 927F         | Human-associated              | GGG CCC GCA CAA GCG G              | 110                | 1.61                 |
| Bvg1016R     | <i>Bacteroides vulgatus</i>   | ATG CCT TGC GGC TTA CGG C          |                    |                      |
| 927F         | Human-associated              | GGG CCC GCA CAA GCG G              | 118                | 1.74                 |
| Bfrg1024R    | <i>Bacteroides fragilis</i>   | TCA CAG CGG TGA TTG CTC A          |                    |                      |
| 927F         | Human-associated              | GGG CCC GCA CAA GCG G              | 110                | 1.65                 |
| Bufm1018R    | <i>Bacteroides uniformis</i>  | CTG CCT TGC GGC TGA CA             |                    |                      |
| C367F        | Cow-specific                  | GGA AGA CTG AAC CAG CCA AGT A      | 116                | 2.07                 |
| C467R        | <i>Bacteroidales</i>          | GCT TAT TCA TAC GGT ACA TAC AAG    |                    |                      |
| Pae-F        | regA gene,                    | CCGACTGACGCCAACGA                  | 211                | 2.09                 |
| Pae-R        | <i>Pseudomonas aeruginosa</i> | CGACCCTACCTCCCACGAAT               |                    |                      |
| Cc-F1        | glyA gene,                    | CATATTGTA AAAACCAAAGCTTATCGG       | 133                | 1.96                 |
| Cc-R1        | <i>Campylobacter coli</i>     | AGTCCAGCAATGTGTGCAATG              |                    |                      |
| Abutz-F      | rpoB gene,                    | ATA CTT TCT TGG TCT TGT GGT GTA    | 132                | 2.35                 |
| Agen-R       | <i>Arcobacter butzleri</i>    | CCA CAA AGA CAC TCA TAA TCT TTT AC |                    |                      |

**Table S3.** Resistance patterns for enterococci and staphylococci isolates retrieved from the beach sands.

| No. of antibiotics | No. of resistant isolates                                                                           | Resistance Pattern                 |
|--------------------|-----------------------------------------------------------------------------------------------------|------------------------------------|
| 1                  | 2 <i>E. faecium</i> ,<br>1 <i>E. casseliflavus</i><br>1 <i>E. faecalis</i><br>1 <i>S. epidermis</i> | K<br>Cz<br>C<br>A                  |
| 2                  | 1 <i>E. faecalis</i><br>2 <i>E. faecium</i>                                                         | K, Cf<br>K, Cz                     |
| 3                  | 1 <i>E. faecalis</i>                                                                                | K, E, Cz                           |
| 4                  | 1 <i>E. faecium</i><br>1 <i>E. faecium</i>                                                          | K, E, C, Mp<br>K, Cz, C, Mp        |
| 5                  | 1 <i>E. faecium</i><br>1 <i>E. faecium</i>                                                          | K, E, Cz, C, Cf<br>K, E, Cz, C, Mp |

Abbreviations:

Ampicillin (A), chloramphenicol (C), ciprofloxacin (Cf), kanamycin (K), tetracycline (T), Erythromycin (E), Ceftazidime (Cz), Meropenem (Mp)

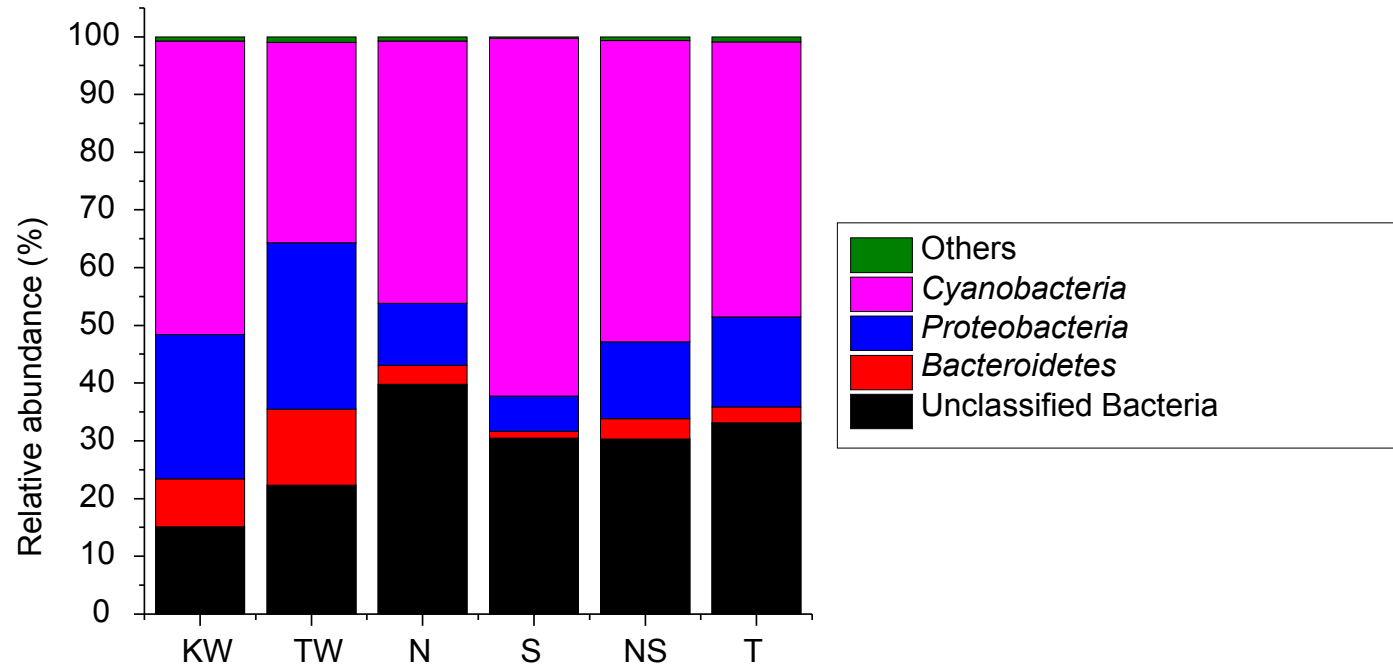

**Figure S1.** Predominant microbial phyla detected in the water samples.

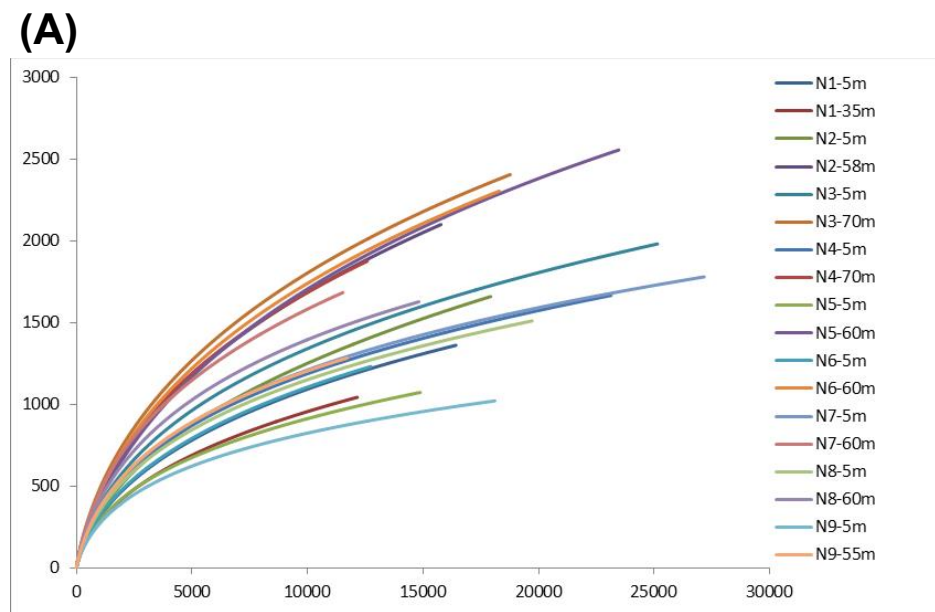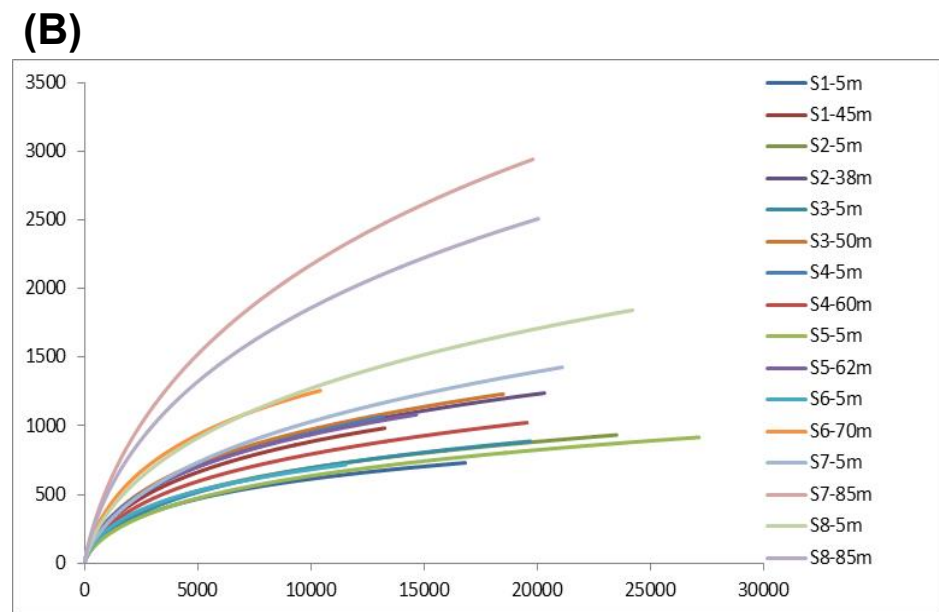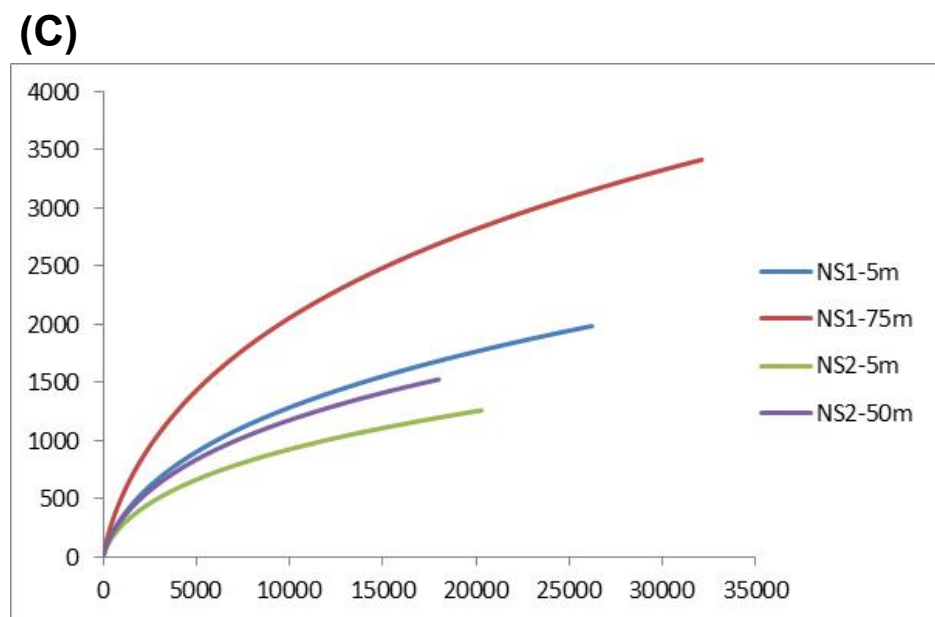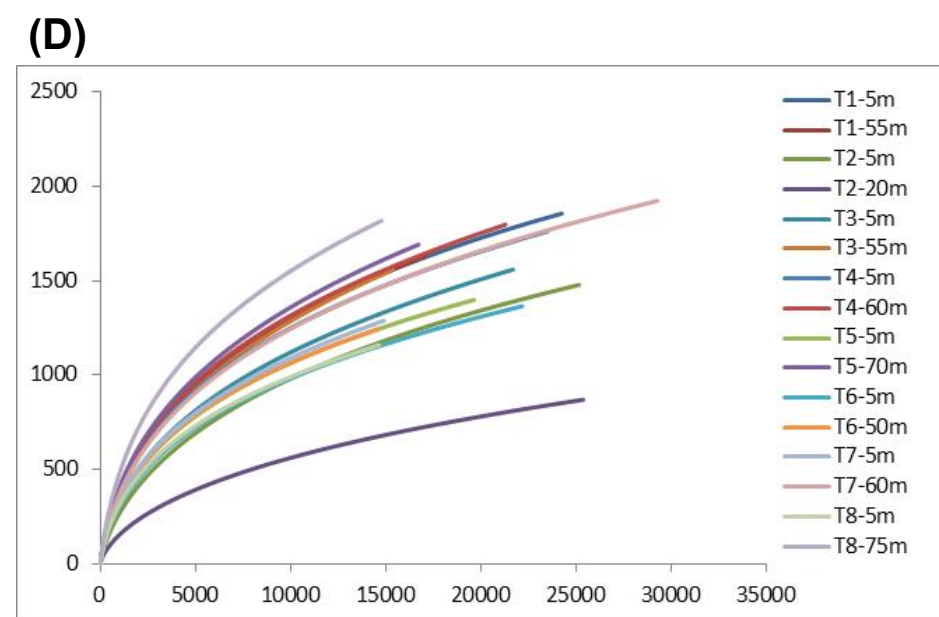

**Figure S2.** Rarefaction curves for all samples collected from **(A)** N sites, **(B)** S sites, **(C)** NS sites, and **(D)** T transects.

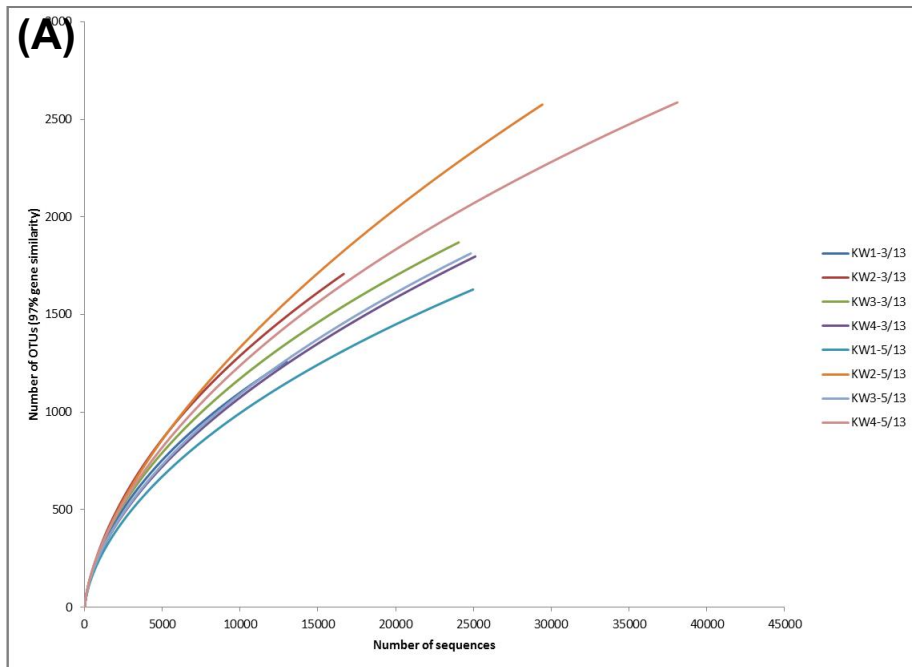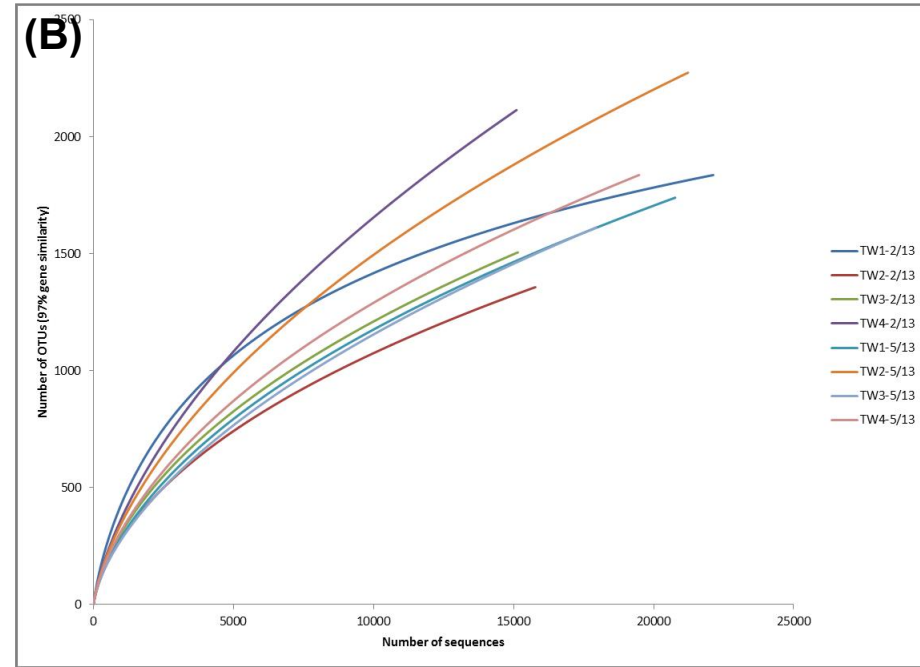

**Figure S3.** Rarefaction curves for all water samples collected from **(A)** KAUST beach, and **(B)** Thuwal beach
